# Supplementary material for: circAMN1-Mediated Ferroptosis Regulates the Expulsion of Placenta in Trophoblast Cells
Source: MDPI journal article supplement (doi:10.3390/antiox13040451), 2024-04-11
Supplement: s1 [file s1]

**Supplementary Table 3.** circRNA and miRNA RNA sequences.

| Gene ID            | Gene name                 | Sense (5'-3')                                                                        | Antisense (5'-3')     |
|--------------------|---------------------------|--------------------------------------------------------------------------------------|-----------------------|
| ENSBTAT00000018812 | circAMN1 1#               | UACAGAUGCCUUUGGUGCTT                                                                 | GCACCAAAGGCAUCUGUUATT |
|                    | circAMN1 2#               | CUCUAAUAACAGAUGCCUUTT                                                                | AAGGCAUCUGUUAUUAGAGT  |
|                    |                           |                                                                                      | T                     |
| bta-mir-205        | miR-205_R-1 mimic         | UCCUUCAUUCCACCGGAGUCU                                                                | ACUCCGGUGGAAUGAAGGAU  |
|                    |                           |                                                                                      | U                     |
|                    | mimic NC                  | UUGUACUACACAAAAGUACUG                                                                | GUACUUUUGUGUAGUACAAU  |
|                    |                           |                                                                                      | U                     |
|                    | bta-miR-205_R-1 inhibitor | (mA)(mG)(mA)(mC)(mU)(mC)(mC)(mG)(mG)(mU)(mG)(mG)(mA)(mA)(mU)(mG)(mA)(mA)(mG)(mG)(mA) | /                     |
|                    | inhibitor NC              | CAG UAC UUU UGU GUA GUA CAA                                                          | /                     |

ENSBTAT00000018812: The linear transcript ID corresponding to circRNA.

bta-mir-205: The registration number of the mature miRNA sequence of the species on the matching miRBase database.
