# Supplementary material for: circAMN1-Mediated Ferroptosis Regulates the Expulsion of Placenta in Trophoblast Cells
Source: MDPI journal article supplement (doi:10.3390/antiox13040451), 2024-04-11
Supplement: s1 [file s1]

**Supplementary Table 2.** Primer information for mRNAs and miRNAs.

| Gene accession number | Gene name          | Primer sequence-Forward (5'-3') | Primer sequence-Reverse (5'-3') |
|-----------------------|--------------------|---------------------------------|---------------------------------|
| NM_001034034.2        | <i>GAPDH</i>       | ACCCAGAAGACTGTGGATGG            | CAACAGACACGTTGGGAGTG            |
| XM_059887429          | <i>SLC39A8</i>     | TGATCACACCCACTTTGGAA            | GGCCCCTTCAAACAAGTACA            |
| XM_059886476.1        | <i>AMN1</i>        | GTCCCTTGCAGGCATTAGGAG           | GGGCATCCATGGAAGAGTAA            |
| bta-mir-205           | <i>miR-205_R-1</i> | AGGCGCATTCTTCATTCCAC            | Universal reverse*              |
| NM_001034740          | <i>U6</i>          | CTGTTGCTGTCATTACTTCTGATG        | Universal reverse*              |

\* Universal reverse was provided by the manufacturer (Evo M-MLV RT Kit with gDNA Clean for qPCR, Accurate Biology, Changsha, Hunan, China).

bta-mir-205: The registration number of the mature miRNA sequence of the species on the matching miRBase database.
