# Supplementary material for: circAMN1-Mediated Ferroptosis Regulates the Expulsion of Placenta in Trophoblast Cells
Source: MDPI journal article supplement (doi:10.3390/antiox13040451), 2024-04-11
Supplement: s1 [file s1]

**Supplementary Table 1.** Primer information for circRNAs.

| Isoform name       | Gene name          | Primer sequence-Forward (5'-3') | Primer sequence-Reverse (5'-3') |
|--------------------|--------------------|---------------------------------|---------------------------------|
| ENSBTAT00000069762 | <i>circRNA1636</i> | TGAGACCAGTGCTGAGGATG            | GGTGACTCCTTTGAGCCAGA            |
| ENSBTAT00000063826 | <i>circRNA1890</i> | AGCATTATCTGCATACCAGAGG          | CAGACTCCACTTTTCCTTCAGC          |
| ENSBTAT00000066850 | <i>circRNA2513</i> | ATGGCCCCTGAGATGTATGA            | CGCTGCCTCTCAGACTTTGT            |
| ENSBTAT00000010553 | <i>circRNA2656</i> | GATGGTCCATTTCTGGATGG            | GCCCCTTGATATCACCTGAA            |
| ENSBTAT00000016319 | <i>circRNA3288</i> | AGATGGAGCCTTGACACTGG            | CAGACTGGGCAACAGCTACA            |
| ENSBTAT00000075440 | <i>circRNA3623</i> | ATGAAGATTTGGAGCGCAAG            | ATCGGAGCTGGAATAAGCAA            |
| intergenic_circRNA | <i>circRNA3998</i> | GGCTTCTGCTCAGTTTCACC            | AAAGGCAGGCAGTTGTTGAT            |
| intergenic_circRNA | <i>circRNA4015</i> | GTATGGAGGGGGTGATTCCCT           | ATCACTCAGTCCCCACAAGG            |
| ENSBTAT00000035479 | <i>circRNA4517</i> | CGAGATGTGAAACACCTGGA            | GCATTGGTGCTCTGAAGATG            |
| ENSBTAT00000013714 | <i>circRNA4804</i> | ACCTCCTGCTGACAGGACAC            | GTTCCCTCCGCTCTTCCTCT            |
| ENSBTAT00000023577 | <i>circRNA6208</i> | GCAAGGTCAGCAGGACTTTT            | GTTGAAGCAGCACAGTTGGA            |
| ENSBTAT00000072428 | <i>circRNA7697</i> | CCTGAGCAACCAGAGAAACC            | CCGAGTGCTCTGTGTAACCA            |
| ENSBTAT00000018812 | <i>circRNA2480</i> | TTCATATGGGGCATTGTGTG            | GGTGGCAAAGGCTTAATGTC            |

Isoform name: The linear transcript ID corresponding to circRNA.
