# Supplementary material for: circAMN1-Mediated Ferroptosis Regulates the Expulsion of Placenta in Trophoblast Cells
Source: MDPI journal article supplement (doi:10.3390/antiox13040451), 2024-04-11
Supplement: s1 [file Supplementary Table 4.xlsx]

## Sheet: Sheet1
Supplementary Table 4. Differentially expressed circRNAs in retained placenta and normal fetal membrane discharge groups.
Index	Accession	RP_1_srpbm	RP_2_srpbm	RP_3_srpbm	NC_1_srpbm	NC_2_srpbm	NC_3_srpbm	Log2(fold_change)	Regulation	p-value	Significant	chr	start	end	strand	exon count	circType	isoformName	geneName	hosting gene type	Flank intron
1	circRNA4804	8.38708	74.3153	55.3377	0	7.33309	0	4.23452	up	0.0289714	yes	chr13	30373653	30387748	-	7	circRNA	ENSBTAT00000013714	MINDY3	mRNA	chr13:30360733-30373652|chr13:30387748-30399563
2	circRNA6208	16.7742	44.5892	55.3377	0	7.33309	0	3.99225	up	0.0414142	yes	chr5	24740274	24740614	-	2	circRNA	ENSBTAT00000023577	NR2C1	mRNA	chr5:24736429-24740273|chr5:24740614-24742386
3	circRNA5514	100.645	89.1783	0	0	14.6662	0	3.69409	up	0.0403515	yes	chr18	35649476	35650866	+	2	circRNA	ENSBTAT00000073737	SLC7A6	mRNA	chr18:35643132-35649475|chr18:35650866-35660866
4	circRNA7697	67.0967	52.0207	63.2431	0	14.6662	0	3.63623	up	0.00596616	yes	chr11	73781018	73825927	+	4	circRNA	ENSBTAT00000072428	DTNB	mRNA	chr11:73771521-73781017|chr11:73825927-73867133
5	circRNA3623	33.5483	52.0207	55.3377	15.7588	0	0	3.16051	up	0.0331165	yes	chr8	38098575	38100865	-	2	circRNA	ENSBTAT00000075440	KDM4C	mRNA	chr8:38094887-38098574|chr8:38100865-38109823
6	ciRNA1636	33.5483	89.1783	23.7162	0	0	16.6221	3.13916	up	0.038278	yes	chr1	115445499	115462394	-	1	ciRNA	ENSBTAT00000069762	MBNL1	mRNA	chr1:115445498-115462394
7	circRNA2307	41.9354	52.0207	110.675	15.7588	0	8.31106	3.08773	up	0.00683314	yes	chr6	93339387	93355089	+	5	circRNA	ENSBTAT00000084625	ANXA3	mRNA	chr6:93335846-93339386|chr6:93355089-93358669
8	ciRNA1642	33.5483	66.8837	39.5269	0	0	16.6221	3.07383	up	0.0362536	yes	chr3	82098237	82100154	+	1	ciRNA	ENSBTAT00000043417	ITGB3BP	mRNA	chr3:82098236-82100154
9	circRNA5677	92.2579	59.4522	94.8646	0	7.33309	24.9332	2.93393	up	0.00288608	yes	chr25	26655491	26656579	+	3	circRNA	ENSBTAT00000009348	ITGAL	mRNA	chr25:26654173-26655490|chr25:26656579-26662718
10	circRNA9898	184.516	74.3153	181.824	0	0	58.1774	2.92112	up	0.00579052	yes	chr13	34759669	34794061	-	3	circRNA	ENSBTAT00000083176	SVIL	mRNA	chr13:34759668-34794061
11	ciRNA1081	134.193	29.7261	55.3377	0	29.3324	0	2.90206	up	0.0281675	yes	chr11	88399667	88415774	+	1	ciRNA	ENSBTAT00000010729	MBOAT2	mRNA	chr11:88399666-88415774
12	circRNA5740	50.3225	29.7261	86.9592	0	14.6662	8.31106	2.86164	up	0.0270714	yes	chr22	53607318	53611518	-	3	circRNA	ENSBTAT00000004549	SACM1L	mRNA	chr22:53602210-53607317|chr22:53611518-53625909
13	circRNA9569	92.2579	81.7468	63.2431	0	0	33.2442	2.83522	up	0.00838124	yes	chr12	69934023	70071824	+	1	intergenic	intergenic_circRNA	intergenic_circRNA	mRNA	chr12:69934022-70071824
14	circRNA5553	159.355	126.336	63.2431	0	51.3316	0	2.76503	up	0.019022	yes	chr26	22668230	22675771	-	3	circRNA	ENSBTAT00000074937	ARMH3	mRNA	chr26:22607521-22668229|chr26:22675771-22696365
15	circRNA7191	1778.06	1969.35	2110.74	0	491.317	506.975	2.55291	up	0.0187952	yes	chr23	27784785	27833696	+	1	intergenic	intergenic_circRNA	intergenic_circRNA	mRNA	chr23:27784784-27833696
16	ciRNA145	58.7096	111.473	47.4323	7.87938	21.9993	8.31106	2.51052	up	0.0141785	yes	chr19	48681614	48681757	-	1	ciRNA	ENSBTAT00000068915	DDX5	mRNA	chr19:48680505-48681757
17	circRNA829	50.3225	74.3153	55.3377	15.7588	0	16.6221	2.47459	up	0.0202828	yes	chr15	4497381	4504485	+	2	circRNA	ENSBTAT00000049292	PDGFD	mRNA	chr15:4445416-4497380|chr15:4504485-4524835
18	circRNA3899	234.838	148.631	371.553	31.5175	43.9985	83.1106	2.25088	up	0.00103942	yes	chr12	71156126	71173270	-	1	intergenic	intergenic_circRNA	intergenic_circRNA	mRNA	chr12:71156125-71173270
19	circRNA4112	142.58	118.904	39.5269	31.5175	36.6655	0	2.14234	up	0.03253	yes	chr5	66018398	66020838	+	1	intergenic	intergenic_circRNA	intergenic_circRNA	mRNA	chr5:66018397-66020838
20	ciRNA1062	75.4838	59.4522	55.3377	0	21.9993	24.9332	2.01942	up	0.0444301	yes	chr26	22526185	22527852	-	1	ciRNA	ENSBTAT00000021734	OGA	mRNA	chr26:22526184-22527852
21	circRNA828	50.3225	74.3153	55.3377	15.7588	7.33309	24.9332	1.90594	up	0.0427508	yes	chr15	4439775	4445416	+	2	circRNA	ENSBTAT00000049292	PDGFD	mRNA	chr15:4259749-4439774|chr15:4445416-4497380
22	circRNA4027	55103.1	51522.8	55242.8	15262.4	13793.5	16946.3	1.81505	up	1.1727e-09	yes	chr23	28570937	28720812	-	1	intergenic	intergenic_circRNA	intergenic_circRNA	mRNA	chr23:28570936-28720812
23	ciRNA1045	159.355	178.357	189.729	0	73.3309	83.1106	1.75339	up	0.0399444	yes	chr5	24083998	24084366	+	1	ciRNA	ENSBTAT00000067615	CEP83	mRNA	chr5:24083997-24084366
24	circRNA538	75.4838	148.631	94.8646	47.2763	21.9993	41.5553	1.5251	up	0.037997	yes	chr10	60361468	60371271	+	4	circRNA	ENSBTAT00000061642	ATP8B4	mRNA	chr10:60350986-60361467|chr10:60371271-60381392
25	circRNA4008	1241.29	720.858	1114.66	252.14	388.654	448.797	1.49765	up	0.00298693	yes	chr23	27782655	27872245	+	1	intergenic	intergenic_circRNA	intergenic_circRNA	mRNA	chr23:27782654-27872245
26	ciRNA596	150.968	111.473	126.486	47.2763	51.3316	41.5553	1.47239	up	0.0238058	yes	chr28	28807556	28813164	+	1	ciRNA	ENSBTAT00000005059	MCU	mRNA	chr28:28807555-28813164
27	circRNA2663	503.225	326.987	292.499	94.5526	131.996	199.465	1.39802	up	0.00976319	yes	chr3	690467	723408	-	3	circRNA	ENSBTAT00000027930	DCAF6	mRNA	chr3:670945-690466|chr3:723408-751967
28	circRNA4098	1945.8	2095.69	2110.74	811.576	703.977	972.394	1.30615	up	0.000198844	yes	chr4	99018047	99100348	-	1	intergenic	intergenic_circRNA	intergenic_circRNA	mRNA	chr4:99018046-99100348
29	circRNA3909	209.677	208.083	324.121	118.191	109.996	99.7327	1.17784	up	0.0284395	yes	chr13	53462430	53506790	+	1	intergenic	intergenic_circRNA	intergenic_circRNA	mRNA	chr13:53462429-53506790
30	circRNA389	519.999	549.933	458.512	126.07	307.99	265.954	1.12661	up	0.0454565	yes	chr11	88410945	88415774	+	2	circRNA	ENSBTAT00000010729	MBOAT2	mRNA	chr11:88363241-88410944|chr11:88415774-88438127
31	circRNA1046	369.032	222.946	284.594	157.588	117.329	132.977	1.10368	up	0.0280947	yes	chr14	77481783	77482329	-	2	circRNA	ENSBTAT00000004335	LRRCC1	mRNA	chr14:77475068-77481782|chr14:77482329-77484942
32	circRNA4015	29212.2	27927.7	31028.6	62979.9	56677.5	72248	-1.12206	down	0.000457116	yes	chr23	28524822	28720812	-	1	intergenic	intergenic_circRNA	intergenic_circRNA	mRNA	chr23:28524821-28720812
33	circRNA1206	75.4838	29.7261	47.4323	118.191	117.329	149.599	-1.33515	down	0.0474879	yes	chr18	13399322	13405618	+	3	circRNA	ENSBTAT00000086866	BANP	mRNA	chr18:13381540-13399321|chr18:13405618-13416654
34	circRNA3802	67.0967	74.3153	126.486	141.829	241.992	307.509	-1.36769	down	0.036941	yes	X	68610593	68625140	+	8	circRNA	ENSBTAT00000075096	RPS6KA6	mRNA	X:68599408-68610592|X:68625140-68684124
35	circRNA1083	92.2579	74.3153	94.8646	196.985	256.658	257.643	-1.44396	down	0.0114493	yes	chr19	18122373	18129559	+	5	circRNA	ENSBTAT00000024457	CRLF3	mRNA	chr19:18107645-18122372|chr19:18129559-18147121
36	circRNA1228	67.0967	22.2946	39.5269	118.191	139.329	99.7327	-1.47049	down	0.0365727	yes	chr18	35549222	35552259	+	2	circRNA	ENSBTAT00000074076	NFATC3	mRNA	chr18:35518202-35549221|chr18:35552259-35569373
37	circRNA3493	16.7742	22.2946	31.6215	63.0351	109.996	58.1774	-1.70961	down	0.0464466	yes	chr4	105299489	105302880	+	4	circRNA	ENSBTAT00000085467	MGAM	mRNA	chr4:105297618-105299488|chr4:105302880-105306369
38	circRNA887	50.3225	89.1783	23.7162	157.588	153.995	224.399	-1.71539	down	0.0149752	yes	chr15	38431604	38432981	+	3	circRNA	ENSBTAT00000015794	RRAS2	mRNA	chr15:38367594-38431603|chr15:38432981-38441592
39	circRNA2071	25.1613	37.1576	31.6215	149.708	36.6655	132.977	-1.76532	down	0.0386555	yes	chr7	17563848	17567349	-	3	circRNA	ENSBTAT00000075720	ENSBTAG00000007901	mRNA	chr7:17562788-17563847|chr7:17567349-17570449
40	circRNA4656	25.1613	29.7261	39.5269	47.2763	153.995	124.666	-1.78752	down	0.0293353	yes	chr10	53675732	53679190	+	3	circRNA	ENSBTAT00000075563	RF00026	mRNA	chr10:53657273-53675731
41	circRNA247	25.1613	22.2946	15.8108	47.2763	73.3309	99.7327	-1.80021	down	0.0379747	yes	chr11	14186821	14195067	-	6	circRNA	ENSBTAT00000081017	XDH	mRNA	chr11:14185698-14186820|chr11:14195067-14196619
42	circRNA4220	41.9354	14.8631	39.5269	157.588	73.3309	108.044	-1.81514	down	0.0181013	yes	chr13	79359791	79364576	-	2	circRNA	ENSBTAT00000067889	NFATC2	mRNA	chr13:79319340-79359790|chr13:79365087-79384487
43	circRNA2816	41.9354	22.2946	0	63.0351	87.9971	83.1106	-1.86607	down	0.0459974	yes	chr3	103927120	103939820	+	2	circRNA	ENSBTAT00000079741	FOXJ3	mRNA	chr3:103902352-103927119|chr3:103939820-103957239
44	circRNA1737	33.5483	29.7261	15.8108	47.2763	80.664	166.221	-1.89513	down	0.0323218	yes	chr21	6012771	6015079	-	2	circRNA	ENSBTAT00000013884	ASB7	mRNA	chr21:5985626-6012770|chr21:6015079-6022669
45	circRNA1000	50.3225	22.2946	0	78.7938	95.3302	99.7327	-1.91504	down	0.0347902	yes	chr14	63639138	63642015	+	6	circRNA	ENSBTAT00000064237	PABPC1	mRNA	chr14:63638727-63639137|chr14:63642015-63643105
46	circRNA4295	58.7096	29.7261	86.9592	196.985	256.658	216.088	-1.93297	down	0.00284744	yes	chr13	33438633	33441433	+	2	circRNA	ENSBTAT00000016846	ARHGAP12	mRNA	chr13:33421267-33438632|chr13:33441433-33481624
47	circRNA3162	41.9354	14.8631	39.5269	110.311	43.9985	216.088	-1.94309	down	0.0276432	yes	chr1	139324500	139340695	-	6	circRNA	ENSBTAT00000018087	BRWD1	mRNA	chr1:139322948-139324499|chr1:139340695-139341175
48	circRNA1364	25.1613	7.43153	15.8108	63.0351	73.3309	58.1774	-2.00691	down	0.0287116	yes	chr27	42063715	42069731	+	2	circRNA	ENSBTAT00000078457	NKIRAS1	mRNA	chr27:42055630-42063714|chr27:42069731-42074840
49	ciRNA572	25.1613	29.7261	15.8108	110.311	29.3324	149.599	-2.03254	down	0.02943	yes	chr16	12470914	12484691	+	1	ciRNA	ENSBTAT00000078194	UCHL5	mRNA	chr16:12470913-12484691
50	circRNA588	33.5483	7.43153	15.8108	78.7938	29.3324	132.977	-2.08593	down	0.0367497	yes	chr10	88027485	88029192	+	2	circRNA	ENSBTAT00000043072	VASH1	mRNA	chr10:88026100-88027484|chr10:88029192-88031890
51	circRNA1544	33.5483	0	23.7162	78.7938	87.9971	83.1106	-2.12565	down	0.0178116	yes	chr22	21570136	21587438	-	5	circRNA	ENSBTAT00000054653	ITPR1	mRNA	chr22:21565767-21570135|chr22:21587438-21590301
52	circRNA1883	41.9354	37.1576	23.7162	220.623	95.3302	141.288	-2.15298	down	0.00305836	yes	X	91076093	91116666	-	5	circRNA	ENSBTAT00000008060	HUWE1	mRNA	X:91056689-91076092|X:91116666-91122871
53	circRNA4505	16.7742	44.5892	15.8108	133.95	102.663	108.044	-2.15897	down	0.00694157	yes	chr18	43126984	43129442	-	5	circRNA	ENSBTAT00000067097	ANKRD27	mRNA	chr18:43126326-43126983|chr18:43129442-43130610
54	circRNA4066	41.9354	14.8631	23.7162	110.311	161.328	99.7327	-2.20554	down	0.00408905	yes	chr27	6223290	6223465	+	1	intergenic	intergenic_circRNA	intergenic_circRNA	mRNA	chr27:6223289-6223465
55	circRNA2954	8.38708	14.8631	15.8108	102.432	36.6655	41.5553	-2.20942	down	0.043652	yes	chr2	112639366	112661310	-	2	circRNA	ENSBTAT00000029018	CUL3	mRNA	chr2:112621155-112639365|chr2:112661310-112699238
56	circRNA1770	8.38708	22.2946	7.90539	55.1557	58.6647	66.4885	-2.22428	down	0.0268174	yes	chr21	33426704	33432429	+	4	circRNA	ENSBTAT00000013167	SIN3A	mRNA	chr21:33423526-33426703|chr21:33432429-33436271
57	circRNA3926	33.5483	29.7261	15.8108	196.985	73.3309	99.7327	-2.22623	down	0.00605501	yes	chr16	45568765	45578546	-	1	intergenic	intergenic_circRNA	intergenic_circRNA	mRNA	chr16:45568764-45578546
58	circRNA3889	16.7742	0	31.6215	47.2763	58.6647	132.977	-2.30356	down	0.0280347	yes	chr12	12343193	12348057	+	1	intergenic	intergenic_circRNA	intergenic_circRNA	mRNA	chr12:12343192-12348057
59	circRNA4389	0	0	47.4323	102.432	73.3309	66.4885	-2.35256	down	0.0402283	yes	chr14	31029371	31035346	+	3	circRNA	ENSBTAT00000017667	SGK3	mRNA	chr14:31023853-31029371|chr14:31035346-31040530
60	circRNA4057	0	22.2946	47.4323	118.191	146.662	124.666	-2.4819	down	0.00469987	yes	chr27	6222012	6222463	+	1	intergenic	intergenic_circRNA	intergenic_circRNA	mRNA	chr27:6222011-6222463
61	circRNA1605	8.38708	7.43153	15.8108	78.7938	14.6662	91.4217	-2.54726	down	0.038239	yes	chr23	3019707	3035565	+	5	circRNA	ENSBTAT00000007050	RAB23	mRNA	None|chr23:3035565-3037345
62	circRNA3998	0	170.925	0	346.693	300.657	382.309	-2.59073	down	0.0449069	yes	chr21	67783188	67820530	+	1	intergenic	intergenic_circRNA	intergenic_circRNA	mRNA	chr21:67783187-67820530
63	circRNA4488	33.5483	0	23.7162	86.6732	109.996	174.532	-2.69649	down	0.00235192	yes	chr10	11424536	11444921	-	8	circRNA	ENSBTAT00000063138	STYX	mRNA	chr10:11413070-11424536|chr10:11444921-11459907
64	circRNA3756	0	0	31.6215	70.9144	29.3324	108.044	-2.71962	down	0.0322413	yes	chr14	12392862	12404067	-	2	circRNA	ENSBTAT00000073081	GSDMC	mRNA	chr14:12379922-12392861|chr14:12404067-12458977
65	circRNA1551	0	7.43153	15.8108	55.1557	21.9993	83.1106	-2.78564	down	0.0429756	yes	chr22	30601256	30633731	+	3	circRNA	ENSBTAT00000021993	FOXP1	mRNA	chr22:30595912-30601255|chr22:30633731-30645994
66	circRNA1406	25.1613	0	0	63.0351	29.3324	83.1106	-2.80201	down	0.0369584	yes	chr24	50545039	50564734	+	8	circRNA	ENSBTAT00000071150	SMAD4	mRNA	chr24:50525440-50545038|chr24:50564734-50574098
67	circRNA964	8.38708	0	15.8108	55.1557	43.9985	83.1106	-2.91309	down	0.011403	yes	chr14	21513185	21523152	-	7	circRNA	ENSBTAT00000076195	RB1CC1	mRNA	chr14:21510531-21513184|None
68	circRNA3562	0	29.7261	0	126.07	43.9985	58.1774	-2.94079	down	0.0192537	yes	chr6	67291130	67295893	-	4	circRNA	ENSBTAT00000000158	FRYL	mRNA	chr6:67287712-67291130|chr6:67295893-67309293
69	circRNA3614	0	0	31.6215	55.1557	87.9971	116.355	-3.0368	down	0.00705388	yes	chr21	64249747	64277096	-	2	circRNA	ENSBTAT00000023987	BCL11B	mRNA	chr21:64196259-64249746|chr21:64277096-64290439
70	circRNA3590	0	0	31.6215	126.07	58.6647	74.7995	-3.03695	down	0.00789213	yes	chr5	49117267	49124222	-	4	circRNA	ENSBTAT00000071902	RASSF3	mRNA	chr5:49124222-49190666
71	circRNA4284	0	0	23.7162	118.191	43.9985	33.2442	-3.04274	down	0.0228465	yes	chr4	114017505	114024148	-	2	circRNA	ENSBTAT00000006102	RHEB	mRNA	chr4:114011444-114017504|chr4:114024148-114056628
72	circRNA4440	16.7742	0	0	39.3969	43.9985	58.1774	-3.07723	down	0.0338983	yes	chr12	69627793	69628546	-	2	circRNA	ENSBTAT00000035486	SOX21	mRNA	chr12:69600720-69627792|chr12:69628546-69666016
73	circRNA4301	0	14.8631	0	39.3969	95.3302	16.6221	-3.34808	down	0.0385815	yes	chr9	90927860	90938387	-	4	circRNA	ENSBTAT00000066732	IPCEF1	mRNA	chr9:90918824-90927859|chr9:90938387-90968542
74	ciRNA581	25.1613	0	0	110.311	80.664	66.4885	-3.35509	down	0.00196694	yes	chr11	40858218	40877018	-	1	ciRNA	ENSBTAT00000007713	FANCL	mRNA	chr11:40858217-40877018
75	ciRNA631	16.7742	0	0	86.6732	43.9985	49.8664	-3.42799	down	0.00874321	yes	chr10	53667456	53679190	+	1	ciRNA	ENSBTAT00000086740	RF00026	mRNA	chr10:53667455-53679190
76	circRNA2044	0	0	15.8108	70.9144	7.33309	99.7327	-3.49274	down	0.0346126	yes	chr7	4351580	4354726	-	3	circRNA	ENSBTAT00000027868	UPF1	mRNA	chr7:4350461-4351579|chr7:4354726-4356335
77	circRNA4504	0	0	15.8108	70.9144	58.6647	66.4885	-3.63237	down	0.00351124	yes	chr18	43119299	43129442	-	9	circRNA	ENSBTAT00000067097	ANKRD27	mRNA	chr18:43118395-43119298|chr18:43129442-43130610
78	circRNA2480	8.38708	0	0	78.7938	36.6655	8.31106	-3.88335	down	0.0493057	yes	chr5	78214029	78229215	+	5	circRNA	ENSBTAT00000018812	AMN1	mRNA	chr5:78176288-78214028|chr5:78229215-78259946
79	circRNA2211	0	0	7.90539	39.3969	51.3316	33.2442	-3.97104	down	0.0262388	yes	chr6	18917890	18922897	+	2	circRNA	ENSBTAT00000080873	TBCK	mRNA	chr6:18916188-18917889|chr6:18922897-18928286
80	circRNA1890	0	7.43153	0	55.1557	36.6655	24.9332	-3.97367	down	0.0376348	yes	X	98742026	98753108	-	2	circRNA	ENSBTAT00000063826	KDM6A	mRNA	X:98730021-98742025|X:98753108-98813231
81	circRNA3288	8.38708	0	0	39.3969	80.664	33.2442	-4.19209	down	0.00933579	yes	chr9	76682085	76687655	-	7	circRNA	ENSBTAT00000016319	REPS1	mRNA	chr9:76670465-76682084|chr9:76687655-76728639
82	circRNA2656	0	0	7.90539	110.311	14.6662	49.8664	-4.46709	down	0.0103681	yes	chr4	118519029	118536619	+	7	circRNA	ENSBTAT00000010553	UBE3C	mRNA	chr4:118510902-118519028|chr4:118536619-118546623
83	circRNA2513	0	0	7.90539	118.191	29.3324	49.8664	-4.64207	down	0.00291978	yes	chr5	107633565	107643676	+	3	circRNA	ENSBTAT00000066850	WNK1	mRNA	chr5:107579323-107633564|chr5:107643676-107662318
84	circRNA4517	0	37.1576	0	496.401	476.651	639.952	-5.43995	down	1.59173e-09	yes	chr12	72753393	72789936	-	2	circRNA	ENSBTAT00000035479	SOX21	mRNA	chr12:72730206-72753392|chr12:72789936-72799903
85	circRNA192	0	7.43153	0	267.899	307.99	315.82	-6.90677	down	3.40486e-11	yes	chr12	72753392	72789936	-	2	circRNA	ENSBTAT00000035479	ENSBTAG00000023309	mRNA	chr12:72730206-72753391|chr12:72789936-72799902
NC: normal fetal membrane discharge; RP: Retained placenta.
Accession: The ID number of circRNA.
A_srpbm: The expression level of the sample (srpbm value) belongs to the normalized circRNA expression level.
Log2(fold_change): Log value, with 2 as the base fold change value (fold change refers to the multiple of differences).
Regulation: Upregulation or downregulation of circRNA in the comparison group and control group (up or down).
pvalue: P-value, hypothesis testing from a statistical perspective, generally P ≤ 0.05 is considered significant, and P ≤ 0.01 is considered extremely significant.
Significant: Whether the difference is significant, if the difference threshold is met (pvalue is less than 0.05, log2fold_change absolute value is greater than or equal to 1), it is marked as yes; otherwise, it is marked as no.
chr: The number of the chromosome where circRNA is located, such as chr1, indicating that the host gene corresponding to circRNA is located on chromosome 1.
Start: The starting site of circRNA on chromosomes.
End: The termination site of circRNA on chromosomes.
strand: CircRNA originates from the sense (+) or antisense (-) strands in the double stranded DNA.
exon count: CircRNA is composed of several exons, i.e. the number of exons.
circType: The classification of circRNAs is that circRNAs composed of exons are labeled as "circRNAs", while circRNAs composed of introns are labeled as "circRNAs".
isoformName: The linear transcript ID corresponding to circRNA.
geneName: The gene name of the linear transcript corresponding to circRNA.
hosting gene type: The linear transcript types corresponding to circRNA, such as mRNA, lncRNA, etc.
FlankIntron: The location of the intron on the flanking edge of the circRNA exon.
