# Supplementary material for: circAMN1-Mediated Ferroptosis Regulates the Expulsion of Placenta in Trophoblast Cells
Source: MDPI journal article supplement (doi:10.3390/antiox13040451), 2024-04-11
Supplement: s1 [file Supplementary Table 5.xlsx]

## Sheet: Sheet1
Supplementary Table 5. Differentially expressed miRNAs associated with programmed cell death in retained placenta and normal fetal membrane discharge groups.
Index	miR_name	NC_1(norm)	NC_2(norm)	NC_3(norm)	RP_1(norm)	RP_2(norm)	RP_3(norm)	rep miRID	up/down	pvalue	fold_change	log2 (fold_change)
1	bta-miR-150_R-1	14118.2	13918.2	14167.8	5659.54	5617.24	5766.76	bta-mir-150	down	1.16058e-06	0.403834	-1.30816
2	bta-miR-193b_R-2	706.97	731.188	728.876	292.784	284.304	314.335	bta-mir-193b	down	4.37889e-06	0.411357	-1.28154
3	bta-miR-375_L-1	389.74	388.187	402.391	139.694	159.609	147.479	bta-mir-375	down	8.50883e-06	0.378528	-1.40153
4	bta-miR-365-3p	334.35	372.269	349.805	168.877	145.144	155.015	bta-mir-365-2,bta-mir-365-1	down	0.00033539	0.443985	-1.17142
5	bta-miR-133a_R+1	7.5531	7.3598	6.40167	172.226	181.223	165.78	bta-mir-133a-2,bta-mir-133a-1	up	0.000679206	24.3603	4.60646
6	bta-miR-1	3.02124	4.62127	5.02988	139.216	131.179	152.862	bta-mir-1-2,bta-mir-1-1	up	0.00196523	33.3999	5.06177
7	bta-miR-205_R-1	20.1416	16.4312	17.376	83.2426	78.807	69.9719	bta-mir-205	up	0.0024359	4.30078	2.1046
8	bta-miR-206	5.0354	8.21559	7.31619	370.286	307.247	355.242	bta-mir-206	up	0.00309749	50.2147	5.65004
9	bta-miR-99b	60.4248	53.4013	52.1279	30.618	24.9389	12.9179	bta-mir-99b	down	0.0121634	0.412613	-1.27714
10	bta-miR-31_R+2	47.3327	44.1588	27.4357	18.1794	10.9731	0	bta-mir-31	down	0.022036	0.245129	-2.02839
11	bta-miR-2484_R-4	17.1203	14.3773	19.205	7.65449	7.98045	0	bta-mir-2484	down	0.0278607	0.308365	-1.69729
12	bta-let-7a-3p_R+1_1ss8AG	18.7988	16.6023	12.6509	9.56811	4.65526	9.509	bta-let-7a-3	down	0.0292253	0.493889	-1.01774
13	bta-miR-138_R+1	89.1265	67.2651	59.4441	46.8837	27.4328	27.4505	bta-mir-138-1	down	0.0298022	0.471502	-1.08466
14	bta-miR-2425-3p_R+2	0	8.21559	0	14.3522	9.97557	16.1474	bta-mir-2425	up	0.037764	4.92662	2.3006
15	bta-miR-18b_R-3	5.53894	9.24254	6.85893	3.82724	0	3.22947	bta-mir-18b	down	0.0395134	0.32609	-1.61666
16	bta-mir-2285bv-p5	9.06371	13.3503	6.40167	0	4.98778	0	bta-mir-2285bv	down	0.0406032	0.173092	-2.53039
17	bta-miR-10225b	10.0708	14.3773	9.14524	18.1794	21.9462	29.0653	bta-mir-10225b	up	0.0460463	2.05966	1.04241
18	bta-miR-1260b	20.1416	8.21559	14.6324	0	4.98778	0	bta-mir-1260b	down	0.0480683	0.116023	-3.10752
NC: normal fetal membrane discharge, RP: Retained placenta.
miR_name	The miR_name is composed of the 1st known miR name in a cluster, a underscore, and a matching annotation: such as
	L-n means the miRNA_seq (detected) is n base less than known rep_miRSeq in the left side;
	R-n means the miRNA_seq (detected) is n base less than known rep_miRSeq in the right side;
	L+n means the miRNA_seq (detected) is n base more than known rep_miRSeq in the left side;
	R+n means the miRNA_seq (detected) is n base more than known rep_miRSeq in the right side;
	2ss5TC13TA means 2 substitution (ss), which are T->C at position 5 and T->A at position 13.
	if there is no matching annotation, the miRNA_seq (detected) is exactly same as known rep_miRSeq.
	New discovered 5p/3p sequence has been annotated as p3/p5: which is directly differentiate with the reported sequences.
norm	Normalized expression data
rep miRID	The registration number of the mature miRNA sequence of the species on the matching miRBase database.
PCD	Programmed cell death
