# Supplementary material for: circAMN1-Mediated Ferroptosis Regulates the Expulsion of Placenta in Trophoblast Cells
Source: MDPI journal article supplement (doi:10.3390/antiox13040451), 2024-04-11
Supplement: s1 [file Supplementary Table 6.xlsx]

## Sheet: Sheet1
Supplementary Table 6. Differentially expressed target mRNAs of miR-205_R-1 associated with programmed cell death in retained placenta and normal fetal membrane discharge groups.
Index	Gene_id	Gene_name	FPKM.RP_1	FPKM.RP_2	FPKM.RP_3	FPKM.NC_1	FPKM.NC_2	FPKM.NC_3	Fold_change	Log2(fold_change)	p-value	Regulation
1	MSTRG.4482	EPAS1	4.16573	4.32921	4.12953	1.77226	2.00371	2.01481	2.1801	1.12439	3.64922e-25	up
2	MSTRG.2332	PTX3	3.24906	3.48929	3.01384	6.67391	7.82081	6.48184	0.464909	-1.10498	1.29643e-12	down
3	MSTRG.25723	SLC39A8	0.296231	0.317457	0.097986	1.65562	1.39066	1.30707	0.163477	-2.61284	1.24206e-10	down
4	MSTRG.6365	CUBN	0.818359	0.726877	0.859635	0.23977	0.373541	0.427859	2.30978	1.20775	1.44125e-07	up
5	MSTRG.17349	VEGFA	2.86362	2.27293	1.71933	1.23985	0.847554	1.17782	2.09967	1.07016	3.44867e-06	up
6	ENSBTAG00000002554	TCAF1	0.366838	0.455801	0.287088	0.876003	0.681091	0.882618	0.45486	-1.13651	6.74585e-06	down
7	MSTRG.19910	GPM6A	0.137658	0.077878	0.205324	0.487132	0.633871	0.671901	0.234736	-2.09089	1.43479e-05	down
8	MSTRG.3426	RBPMS2	0.176237	0.036846	0.210646	0.467099	0.60805	0.786986	0.22755	-2.13574	0.000965211	down
9	MSTRG.24532	SLC16A7	0.0001	0.0331498	0.0151902	0.107842	0.146159	0.136669	0.123992	-3.01168	0.00789547	down
10	ENSBTAG00000019734	CD276	0.086699	0.089537	0.112622	0.189684	0.204955	0.233208	0.460077	-1.12005	0.0153985	down
11	ENSBTAG00000019807	COL27A1	0.019854	0.017361	0.041074	0.064127	0.077644	0.072747	0.364953	-1.45422	0.0279805	down
NC: normal fetal membrane discharge; RP: Retained placenta.
FPKM: the fragments per kilobase of exon per million mapped fragments.
PCD: programmed cell death.
